# Supplementary material
Source: PubMed Central journal article supplement (PMC5999002)
Supplement: JCB707671_supplementary_material.pdf [file JCB707671_supplementary_material.pdf]

Supplementary Figure 1

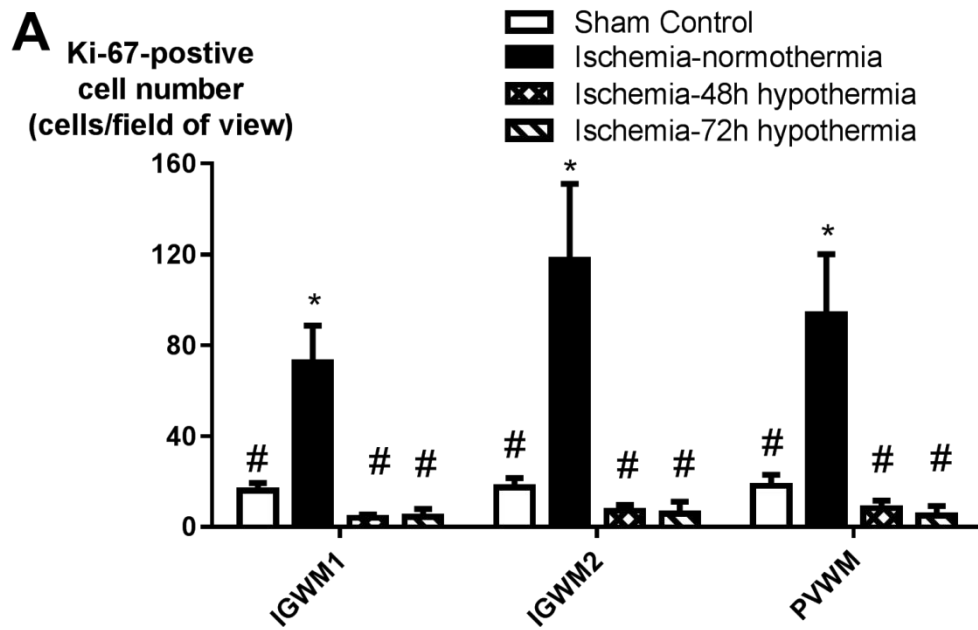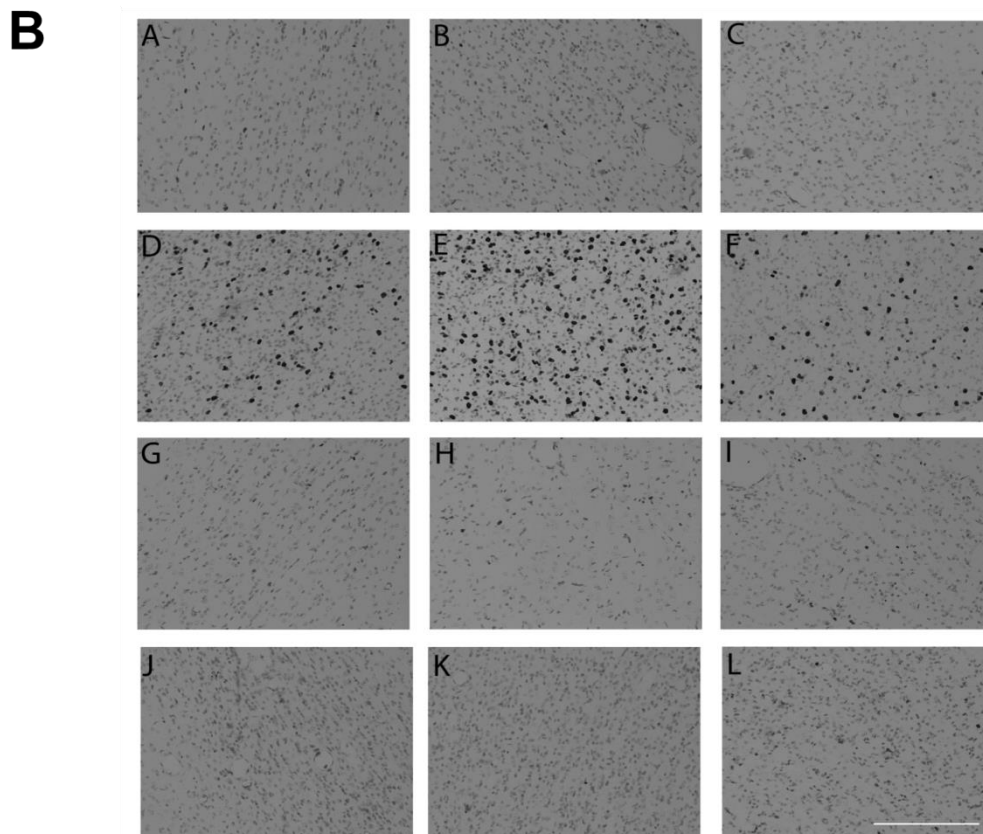

Cell proliferation in the intragyrus white matter of the first and second parasagittal gyri and the periventricular white matter in the sham control, ischemia-normothermia, ischemia-48 h

hypothermia and ischemia-72 h hypothermia groups. Panel A. Ischemia was associated with a significant increase in the number of Ki67-positive proliferating cells in all white matter regions, which was restored to sham control levels in both hypothermia groups. Data are mean±SEM, \*p<0.05 vs sham control, #p<0.05 vs ischemia-normothermia. Panel B. Photomicrograph of Ki67-positive labelling in the intragyral white matter of the first parasagittal gyrus (A, D, G, J), the second parasagittal gyrus (B, E, H, K) and the periventricular white matter (C, F, I, L) in the sham control (A-C), ischemia-normothermia (D-F), ischemia-48 h (G-I) and ischemia-72 h (J-L) groups. Scale bar 200 µm.
